# Supplementary material for: Prediction of DNA-binding residues in proteins from amino acid sequences using a random forest model with a hybrid feature
Source: PubMed Central journal article supplement — Bioinformatics. 2008 Nov 12;25(1):30–5. doi: 10.1093/bioinformatics/btn583 (PMC2638931; doi:10.1093/bioinformatics/btn583), 2008-11-12
Supplement: btn583_1.pdf [file btn583_1.pdf]

## 1. Dataset

**Supplementary Table 1** Protein chain IDs of datasets (PDB ID\_chain)

| DBP-374 |        |        |        |        |        |        |        |        |        |
|---------|--------|--------|--------|--------|--------|--------|--------|--------|--------|
| 1A0A_A  | 1D2L_A | 1GTW_A | 1IU3_C | 1LB2_B | 1OZJ_A | 1RZ9_A | 1XSD_A | 2C62_A | 2HZV_A |
| 1A35_A  | 1D5Y_A | 1GXP_A | 1IV6_A | 1LLM_C | 1P4E_A | 1RZR_L | 1Y1W_D | 2C6Y_A | 2I0Q_B |
| 1A36_A  | 1D66_A | 1H0M_A | 1IXY_A | 1LQ1_A | 1P7D_A | 1S40_A | 1Y1W_G | 2C9L_Y | 2I13_A |
| 1A6Y_A  | 1D8Y_A | 1H6F_A | 1J1V_A | 1LRR_A | 1P8K_Z | 1SA3_A | 1Y6F_A | 2CCZ_A | 2IIE_A |
| 1A73_A  | 1DC1_A | 1H88_C | 1J4W_A | 1LWS_A | 1PER_L | 1SFU_A | 1YNW_B | 2CGP_A | 2ISZ_A |
| 1AKH_A  | 1DCT_A | 1H89_A | 1J5N_A | 1M06_F | 1PH1_B | 1SKN_P | 1YO5_C | 2D45_A | 2IX1_A |
| 1AKH_B  | 1DEW_A | 1H8A_C | 1J5O_A | 1M06_G | 1PP8_F | 1SKR_B | 1YZ8_P | 2D5V_A | 2JEA_A |
| 1AM9_A  | 1DIZ_A | 1H9D_A | 1J75_A | 1M07_A | 1PUE_E | 1SVC_P | 1Z1B_A | 2D7D_A | 2JEA_B |
| 1AN4_A  | 1DMU_A | 1H9T_A | 1JB7_A | 1M5X_A | 1PUF_A | 1T2K_D | 1Z63_A | 2DDG_A | 2JEA_I |
| 1AOL_A  | 1DNK_A | 1HAO_H | 1JB7_B | 1MDM_  | 1PUF_B | 1T38_A | 1Z9C_A | 2DGC_A | 2NLL_A |
| 1AOL_B  | 1DP7_P | 1HBX_A | 1JE8_A | 1MDY_A | 1PV4_A | 1TAU_A | 1ZGW_A | 2DPI_A | 2NOB_A |
| 1AOL_D  | 1DSZ_A | 1HBX_G | 1JEY_A | 1MJE_A | 1PY1_A | 1TEZ_A | 1ZLK_A | 2DRP_A | 2NP2_A |
| 1AV6_A  | 1DUX_C | 1HHT_P | 1JEY_B | 1MJE_B | 1Q0T_A | 1TF3_A | 1ZME_C | 2DWL_A | 2NRA_C |
| 1AWC_A  | 1ECR_A | 1HJB_A | 1JFI_A | 1MM8_A | 1Q9Y_A | 1TF6_A | 1ZQ3_P | 2ER8_A | 2NTC_A |
| 1AWC_B  | 1EMH_A | 1HLO_A | 1JFI_B | 1MNM_  | 1QAI_A | 1TQE_P | 1ZS4_A | 2ES2_A | 2O4I_A |
| 1AZP_A  | 1E03_A | 1HLV_A | 1JMC_A | 1MNM_  | 1QBJ_A | 1TRO_A | 1ZTG_A | 2ETW_A | 2OAA_A |
| 1B2M_A  | 1EQZ_C | 1HWT_C | 1JNM_A | 1MOW_  | 1QN3_A | 1TSR_A | 1ZX4_A | 2EX5_A | 2ODI_A |
| 1B3T_A  | 1EQZ_D | 1I3J_A | 1JT0_A | 1MSE_C | 1QPI_A | 1TTU_A | 1ZZI_A | 2EZV_A | 2OFI_A |
| 1B72_A  | 1EWN_A | 1I6H_A | 1K61_A | 1MTL_A | 1QRV_A | 1U1K_A | 2A07_F | 2F8N_K | 2OH2_A |
| 1B72_B  | 1EXL_A | 1I6H_B | 1K60_B | 1MVM_  | 1QUM_A | 1U3E_M | 2A0I_A | 2F8X_K | 2OST_A |
| 1B8I_A  | 1EYG_A | 1I6H_C | 1K78_A | 1MW8_X | 1QZG_A | 1U78_A | 2A1R_A | 2F8X_M | 2OWO_A |
| 1B8I_B  | 1EYU_A | 1I6H_E | 1K8G_A | 1NFK_A | 1R0N_B | 1U8B_A | 2A3V_A | 2FD8_A | 2PJR_A |
| 1BDH_A  | 1F0V_A | 1I6H_F | 1KB2_A | 1NG9_A | 1R0O_A | 1U8R_A | 2A66_A | 2FIO_A | 2PJR_B |
| 1BF5_A  | 1F2L_G | 1I6H_H | 1KBU_A | 1NGM_B | 1R4I_A | 1UBD_C | 2A6O_A | 2FKC_A | 2STT_A |
| 1BG1_A  | 1F4K_A | 1I6H_I | 1KC6_A | 1NH2_C | 1R4O_A | 1V14_A | 2ACJ_A | 2FO1_D | 3CRO_L |
| 1BHM_A  | 1F4S_P | 1I6H_J | 1KDH_A | 1NK2_P | 1R71_A | 1VAS_A | 2AJQ_A | 2FO1_E | 3HTS_B |
| 1BRN_L  | 1F5T_A | 1I6H_K | 1KQQ_A | 1NKP_A | 1R7M_A | 1VFC_A | 2AOQ_A | 2FQZ_A | 3KTQ_A |
| 1BVO_A  | 1FIU_A | 1I6H_L | 1KSY_A | 1NLW_A | 1R8D_A | 1VRR_A | 2AQ4_A | 2GIP_A | 3ORC_A |
| 1C7Y_A  | 1FJL_A | 1I7D_A | 1KU7_A | 1NOP_A | 1RC7_A | 1W36_B | 2ASD_A | 2GAT_A | 3PJR_A |
| 1C9B_A  | 1FOK_A | 1IAW_A | 1L1M_A | 1NOY_A | 1RC8_A | 1W36_C | 2AYB_A | 2GLI_A | 4GAT_A |
| 1CEZ_A  | 1FOS_E | 1IC8_A | 1L1T_A | 1NWQ_A | 1REP_C | 1W36_D | 2B9S_A | 2GXA_A | 6PAX_A |
| 1CF7_A  | 1FZP_B | 1ID3_C | 1L3S_A | 1O4X_A | 1RIO_A | 1WVL_A | 2B9S_B | 2GZK_A | 10MH_A |
| 1CF7_B  | 1G38_A | 1ID3_D | 1L9Z_A | 1O4X_B | 1RM1_A | 1X9N_A | 2BGW_A | 2H1O_E |        |
| 1CIT_A  | 1G4D_A | 1IF1_A | 1L9Z_C | 1ODG_A | 1RM1_B | 1XF2_B | 2BOP_A | 2H27_A |        |
| 1CKQ_A  | 1GCC_A | 1IG4_A | 1L9Z_D | 1ODH_A | 1RM1_C | 1XHZ_A | 2BSQ_A | 2H7G_X |        |
| 1CMA_A  | 1GD2_E | 1IGN_A | 1L9Z_E | 1ORN_A | 1RRQ_A | 1XJV_A | 2BSQ_E | 2H8C_A |        |
| 1CW0_A  | 1GDT_A | 1IHF_A | 1L9Z_H | 1OSB_A | 1RTD_B | 1XPX_A | 2BZF_A | 2HDC_A |        |
| 1D02_A  | 1GM5_A | 1I04_D | 1LAU_E | 1OUP_A | 1RXV_A | 1XS9_A | 2C5R_A | 2HVR_A |        |
| PDNA-62 |        |        |        |        |        |        |        |        |        |
| 1A02_F  | 1BF5_A | 1CMA_A | 1GCC_A | 1HWT_D | 1MDY_A | 1PAR_B | 1REP_C | 1UBD_C | 2DRP_D |
| 1A02_J  | 1BHM_A | 1D02_A | 1GDT_A | 1IF1_A | 1MEY_F | 1PDN_C | 1SRS_A | 1XBR_A | 2GLI_A |
| 1A02_N  | 1BL0_A | 1D66_A | 1HCQ_A | 1IGN_A | 1MHD_A | 1PER_L | 1SVC_P | 1YRN_A | 2HDC_A |
| 1A74_A  | 1C0W_B | 1DP7_P | 1HCR_A | 1IHF_A | 1MNM_  | 1PNR_A | 1TC3_C | 1YRN_B | 3CRO_L |
| 1AAY_A  | 1CDW_A | 1ECR_A | 1HDD_C | 1IHF_B | 1MNM_  | 1PUE_E | 1TF3_A | 1YSA_C |        |
| 1AZQ_A  | 1CF7_A | 1FJL_A | 1HLO_A | 1J59_A | 1MSE_C | 1PVI_B | 1TRO_A | 1YUI_A |        |

| 1B3T_A      | 1CJG_A | 1GAT_A | 1HRY_A | 1LMB_4 | 1OCT_C | 1PYI_A | 1TSR_A | 2BOP_A |        |
|-------------|--------|--------|--------|--------|--------|--------|--------|--------|--------|
| <b>TS75</b> |        |        |        |        |        |        |        |        |        |
| 1A6Y_A      | 1CIT_A | 1EMH_A | 1HHT_P | 1L9Z_H | 1O4X_B | 1RXV_A | 1YO5_C | 2C6Y_A | 2PJR_B |
| 1AKH_A      | 1CKQ_A | 1EO3_A | 1I6H_E | 1LAU_E | 1QN3_A | 1RZ9_A | 1ZGW_A | 2EZV_A | 3PJR_A |
| 1AKH_B      | 1CW0_A | 1F0V_A | 1IAW_A | 1M06_G | 1QZG_A | 1RZR_L | 2A1R_A | 2FO1_E | 4GAT_A |
| 1AOL_B      | 1D2L_A | 1FIU_A | 1J4W_A | 1MJE_B | 1R0N_B | 1SKN_P | 2A66_A | 2GZK_A |        |
| 1AOL_D      | 1DC1_A | 1FOK_A | 1J5N_A | 1NGM_B | 1RC8_A | 1TQE_P | 2ASD_A | 2H7G_X |        |
| 1AWC_A      | 1DNK_A | 1GD2_E | 1JNM_A | 1NK2_P | 1RM1_B | 1U3E_M | 2B9S_A | 2I0Q_B |        |
| 1B2M_A      | 1DSZ_A | 1HAO_H | 1JT0_A | 1NKP_A | 1RM1_C | 1Y1W_D | 2B9S_B | 2JEA_I |        |
| 1C9B_A      | 1DUX_C | 1HBX_A | 1K61_A | 1NLW_A | 1RRQ_A | 1Y1W_G | 2BSQ_E | 2OFI_A |        |

## 2. Performance comparisons with DISIS.

DISIS (<http://cubic.bioc.columbia.edu/services/disis>) (Ofran, et al., 2007) predicts DNA-binding sites (6.0 Å is designated as the cutoff distance in the definition of them) in a DNA-binding protein from its amino acid sequence through neural networks (NN) and SVM relying on sequence environment, evolutionary profiles and predicted structural features (secondary structure, solvent accessibility, globularity). Putative DNA-binding residues in the test dataset TS75 were predicted by DISIS with the default values for the optional parameters. We also trained RF models with the exactly same strategy as that for DP-Bind, except that the different cutoff distance (6.0 Å) in the definition of a binding residue. Then, the RF models were used to predict putative DNA-binding residues in the test dataset TS75. The overall accuracy is 81.59% with a low SE 7.65% for the DISIS predictor, and the low SE value may be due to DISIS's more focus on the accuracy of predicted positive samples (Supplementary Table 2). The total accuracy is 78.24% for the RF predictor (Supplementary Table 2).

**Supplementary Table 2** . Performance comparisons with DISIS.

| Classifiers | ACC(%) | SE (%) | PR (%) | SP (%) | MCC   |
|-------------|--------|--------|--------|--------|-------|
| DISIS       | 81.59  | 7.65   | 70.37  | 99.23  | 0.190 |
| RF          | 78.24  | 51.38  | 44.25  | 84.62  | 0.341 |

## 3. Detailed presentation of the prediction of a representative protein-DNA complex.

To demonstrate that the RF-based model is a useful tool for understanding protein-nucleic acid interactions, we have applied it to predict DNA-binding residues in the archaeal TATA-box-binding protein (TBP) in the structure of TBP/TFB/promoter complex (PDB ID: 1D3U) by visualizing them in the format of three-dimensional structures. The TBP contains 181 residues and was not used for training the RF classifier. Its only homologue in the DBP-374 dataset is the wild-type TATA box-binding protein (TBP) in the structure of TBP-TATA box complex (PDB ID: 1QN3) with 38% sequence identity. The actual DNA-contacting residues were verified by Otis Littlefield et al. (Littlefield, et al., 1999) and these are E12,N13,V15,K37,F43,P44,I47,H49,L58,F60,S62,V66,T68,Q103,N104,V106,F134,P135,R140,V147,L149,F151,S153,V157 and S159. As shown in Supplementary Fig.1., twenty out of twenty-five DNA-binding residues (80.00%) are correctly identified and highlighted in red. The five residues in orange are false negatives (DNA-binding residues but predicted as negatives). For the non-binding residues, 104 of 146 (71.23%) are predicted correctly (residues in blue) and 42

are wrongly predicted (residues in yellow). The total 10 residues located at the N-terminal and C-terminal of the TBP were not used for reporting prediction performance by the RF model and shown in light pink. The results show that DNA-binding residues were predicted by the RF model at 72.51% overall accuracy with Matthew's correlation coefficient (MCC) of 0.377, and with a sensitivity of 80.00% and a specificity of 71.23%. The overall accuracy is 79.56% and 65.14% with the low sensitivity 24.00% and 36.00% for the BindN and Ho et al predictors, and 83.42%, 84.53% and 76.24% for the SVM, KLR and PLR predictors in DP-Bind, respectively.

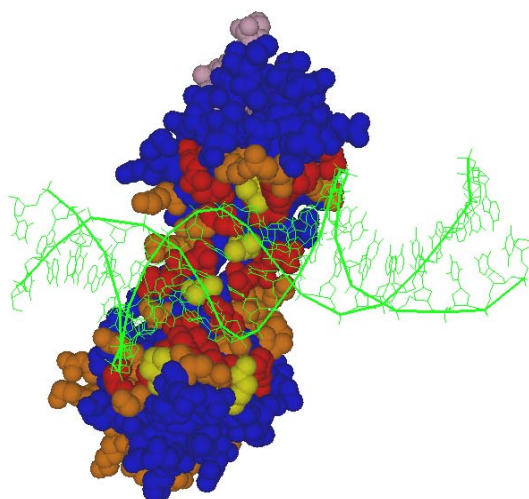

**Supplementary Fig.1.** Prediction performance of residues within the archaeal TATA-box-binding protein (TBP) in the structure of TBP/TFB/promoter complex (PDB ID: 1D3U) and its presentation in the format of three-dimensional structures. The correctly identified binding residues (true positives,TPs) are in red space fill; the correctly identified non-binding residues (true negatives,TNs) are in blue space fill; the binding residues with negative predictions (false negatives,FNs) are in orange space fill; the non-binding residues but wrongly predicted as positives (false positives,FPs) are in yellow space fill; the total 10 residues located in the N-terminal and C-terminal of the TBP protein were not used in reporting prediction performance by our model and shown in light pink space fill. The DNA molecule is indicated in green wire frame. The picture is generated with PyMOL (<http://www.pymol.org>). Prediction performance: ACC 72.51%, SE 80.00%, SP 71.23%, MCC 0.377.

#### **4. Comparison of prediction performances of the different lengths of a data instance.**

The length of the structural motifs ranges from 7 to ~20 residues in the protein-DNA complexes. Comparison of prediction performances is studied on considering different lengths of a data instance from 7 to 19 residues (Supplementary Fig.2). Compared with other window sizes, the RF classifiers constructed with  $\beta = 11$  presented the best performance.

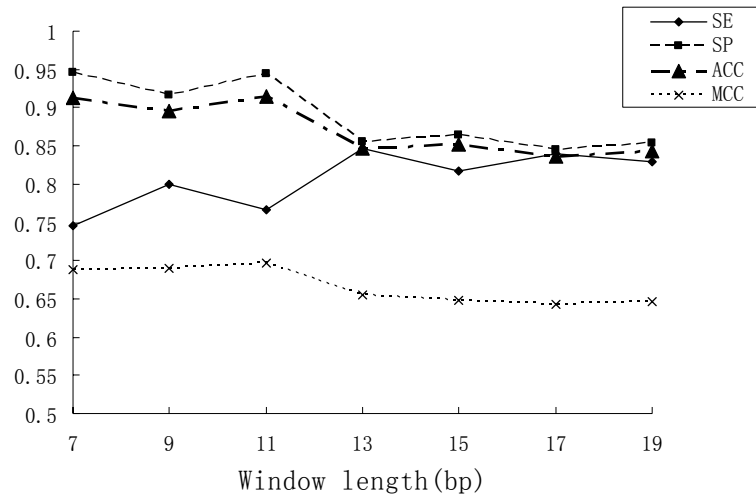

Supplementary Fig.2. Comparison of prediction performances when considering different lengths of a data instance.
